# Supplementary material
Source: MDPI journal article supplement (https://www.mdpi.com/2227-9040/10/11/454)
Supplement: s1 [file s1]

## **SUPPLEMENTARY INFORMATION**

### **An automated, self-powered and integrated IoT analytical platform for on-line and in-situ air quality monitoring**

Danielle da Silva Souza, Vanderli Garcia Leal, Gustavo dos Reis S. Trindade, Sidnei G. da Silva, Arnaldo Alves Cardoso and João Flávio da Silveira Petrucci\*

Federal University of Uberlândia (UFU), Institute of Chemistry, Uberlândia, MG,  
Brazil

Corresponding author's e-mail: [jfpetrucci@gmail.com](mailto:jfpetrucci@gmail.com)

The following schemes present the preparation method of standard gaseous solutions of O<sub>3</sub> and NO<sub>2</sub>

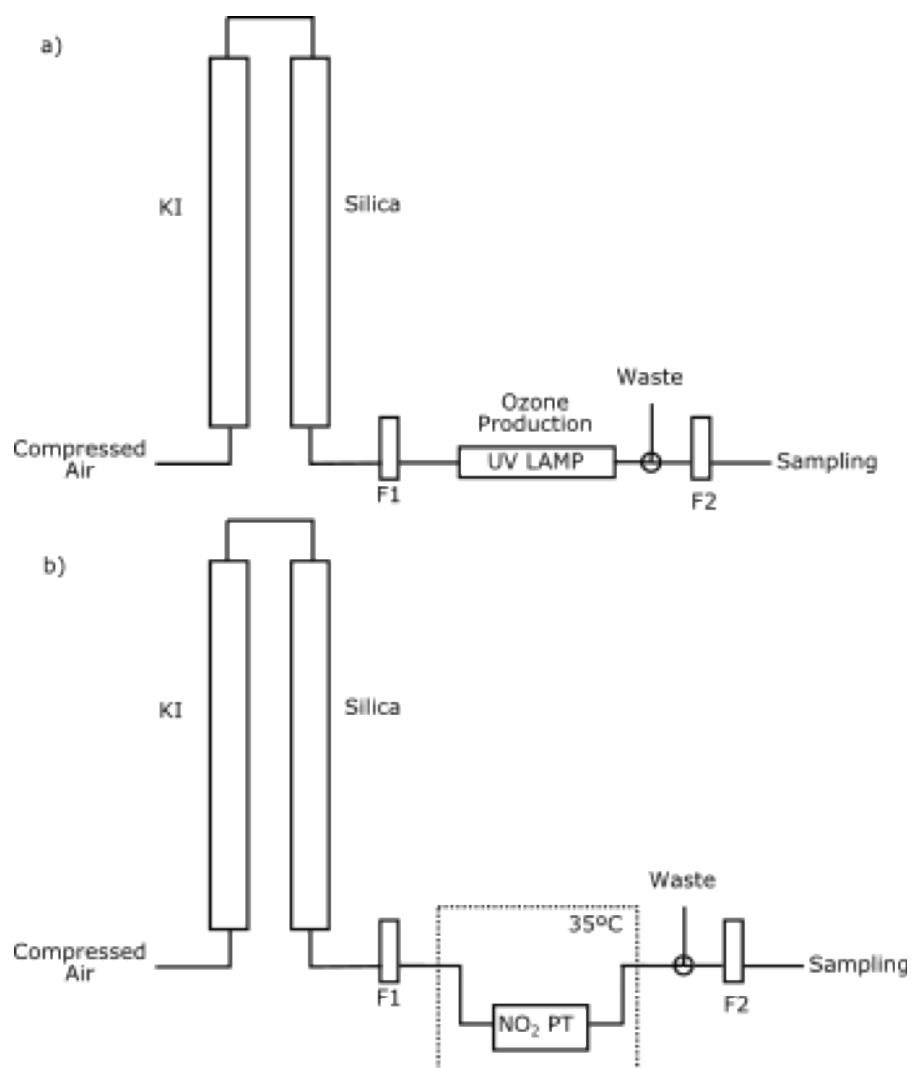

Figure S1. Schemes of the standard gaseous solutions systems

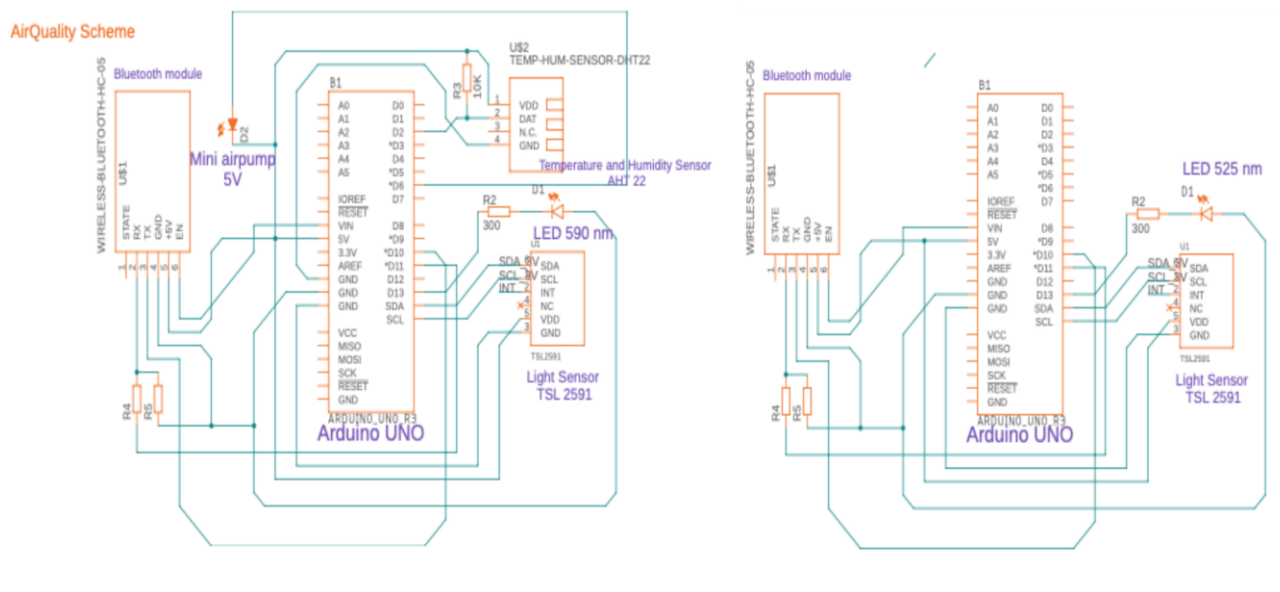

Figure S2. The electric circuit scheme of the IoT platform

a)

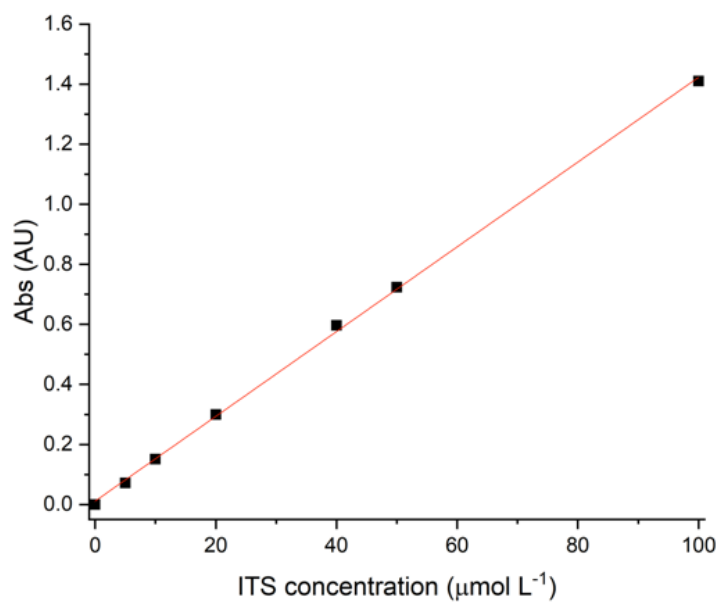

b)

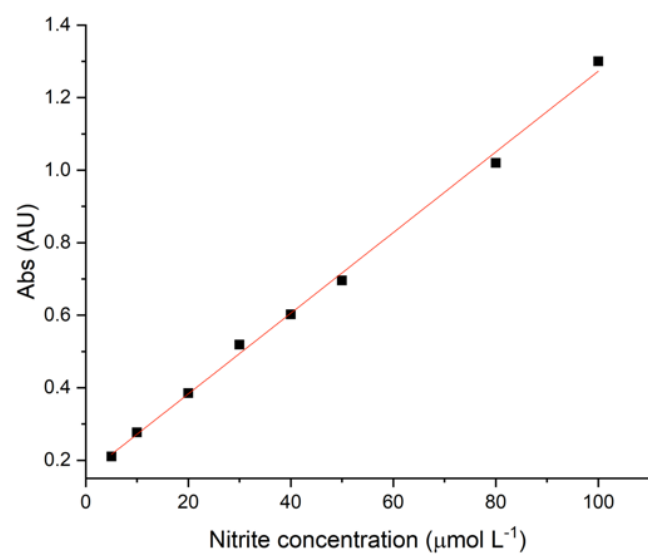

Figure S3. Analytical curve of absorbance versus indigotrisulfonate (a) and nitrite (b) concentrations built using the developed detection device
